# Supplementary material for: Climate change and deforestation drive the displacement and contraction of tropical montane cloud forests
Source: Research Square preprint supplement (doi:10.21203/rs.3.rs-1036888/v1), 2021-12-02
Supplement: Supplementary file 1 [file 3ae2a23e53c2324465a14cf3.pdf]

## **Supplementary Information**

### **Climate change and deforestation drive the displacement and contraction of tropical montane cloud forests**

Santiago Ramírez-Barahona, Angela P. Cuervo-Robayo, Kenneth Feeley, Andrés Ortiz-Rodríguez, Antonio A Vásquez-Aguilar, Juan Francisco Ornelas, Hernando Rodríguez-Correa

#### **This file contains**

- Supplementary tables S1–S3
- Supplementary figures S1–S9.
- Data and code available at *Zenodo* with the identifier:  
[doi.org/10.5281/zenodo.5587220](https://doi.org/10.5281/zenodo.5587220)

**Supplementary tables**

**Supplementary table S1. Historical altitudinal trends for vascular plant species across Mesoamerican cloud forests over the period 1901–2016.** Model coefficients estimated for the species' upper range limits using a Piecewise Growth Model with two time periods: 1901–1975 (pre-breakpoint) and 1976–2016 (post-breakpoint).

| group   | term                  | estimate | std.error |
|---------|-----------------------|----------|-----------|
|         | Intercept             | 1,632.31 | 36.91     |
|         | pre-breakpoint slope  | 19.31    | 1.95      |
|         | post-breakpoint slope | -41.38   | 4.12      |
| Species | Intercept             | 725.51   |           |
| Species | pre-breakpoint slope  | 33.15    |           |
| Species | post-breakpoint slope | 75.99    |           |
|         | Residual              | 201.83   |           |

**Supplementary table S2. Historical altitudinal trends for vascular plant species across Mesoamerican cloud forests over the period 1901–2016.** Model coefficients estimated for the species’ range mid-points using a Piecewise Growth Model with two time periods: 1901–1975 (pre-breakpoint) and 1976–2016 (post-breakpoint).

| group   | term                  | estimate | std.error |
|---------|-----------------------|----------|-----------|
|         | Intercept             | 1,058.80 | 33.13     |
|         | pre-breakpoint slope  | 2.89     | 1.66      |
|         | post-breakpoint slope | -7.82    | 3.18      |
| Species | Intercept             | 660.73   |           |
| Species | pre-breakpoint slope  | 29.52    |           |
| Species | post-breakpoint slope | 59.39    |           |
|         | Residual              | 147.73   |           |

**Supplementary table S3. Historical altitudinal trends for vascular plant species across Mesoamerican cloud forests over the period 1901–2016.** Model coefficients estimated for the species’ lower range limits using a Piecewise Growth Model with two time periods: 1901–1975 (pre-breakpoint) and 1976–2016 (post-breakpoint).

| group   | term                  | estimate | std.error |
|---------|-----------------------|----------|-----------|
|         | Intercept             | 600.39   | 24.42     |
|         | pre-breakpoint slope  | -10.08   | 1.42      |
|         | post-breakpoint slope | 14.94    | 3.08      |
| Species | Intercept             | 473.69   |           |
| Species | pre-breakpoint slope  | 24.034   |           |
| Species | post-breakpoint slope | 56.87    |           |
|         | Residual              | 150.42   |           |

30

**Supplementary figures**

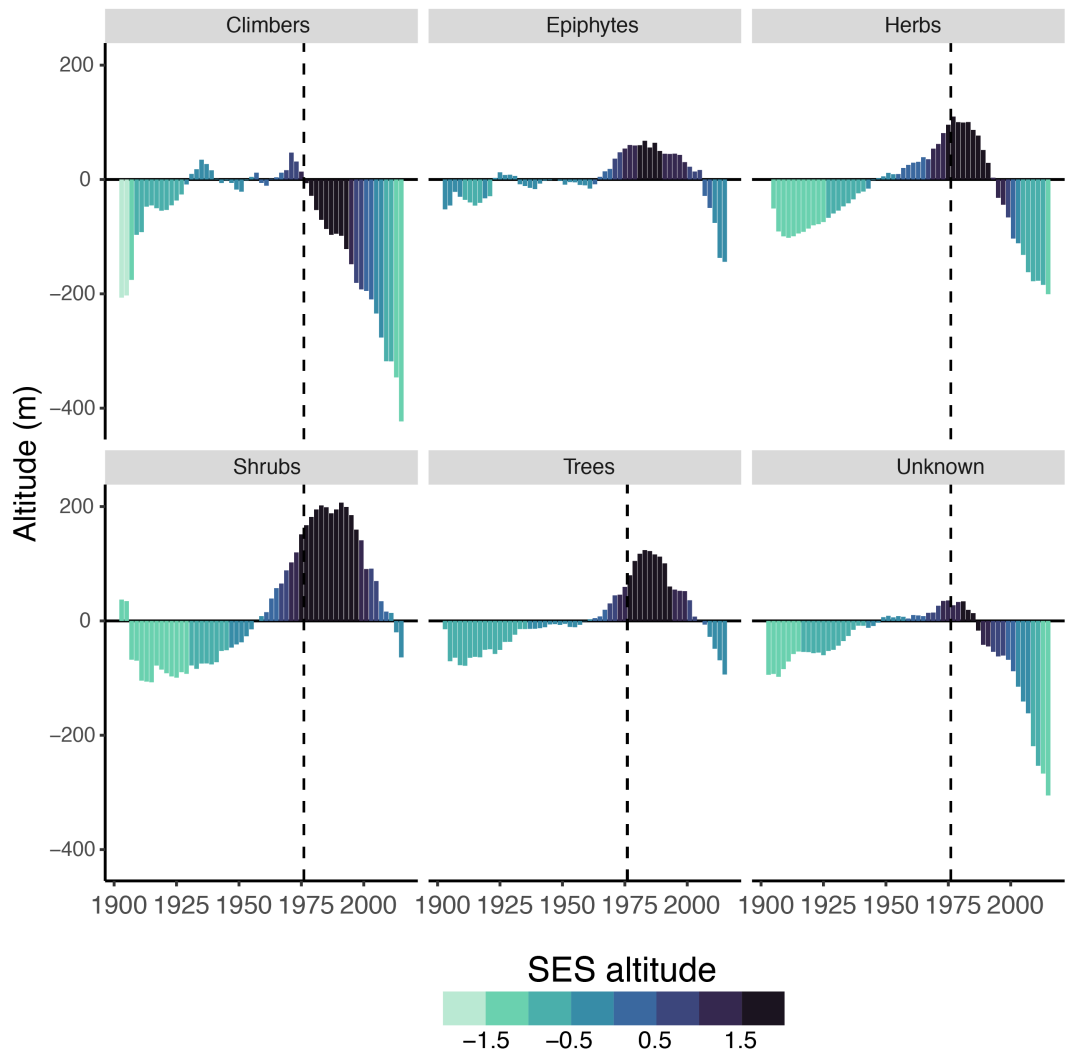

**Supplementary figure S1. Historical mean altitudinal trends for the upper range limits across Mesoamerican cloud forest plant species over the period 1901–2016.**

a–c, bi-yearly mean deviations from baseline averages (that is, species' average during 1901–1975) for the upper limit of species' ranges. Species estimates are grouped by growth form. Estimates are based on the first derivative of the fitted smoothing splines averaged across individual species. Colour scale represents the mean Standardized Effect sizes (SES) across species estimated through simulations. Estimates are based on the predicted values of the fitted smoothing splines. Vertical dashed lines in a–d indicate the pre-defined breakpoint (that is, 1975–1976).

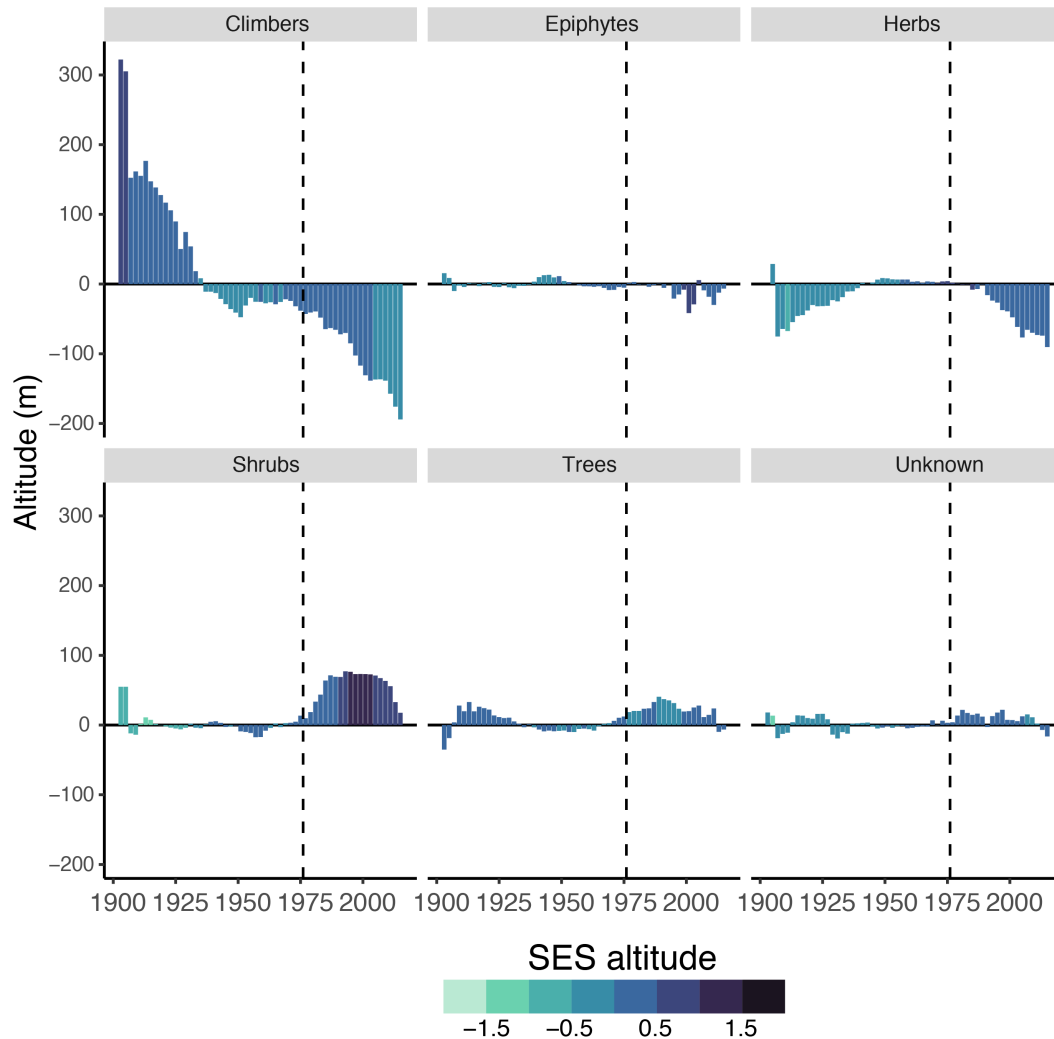

**Supplementary figure S2. Historical mean altitudinal trends for the mid-range point across Mesoamerican cloud forest plant species over the period 1901–2016.** a–c, bi-yearly mean deviations from baseline averages (that is, species' average during 1901–1975) for the upper limit of species' ranges. Species estimates are grouped by growth form. Estimates are based on the first derivative of the fitted smoothing splines averaged across individual species. Colour scale represents the mean Standardized Effect sizes (SES) across species estimated through simulations. Estimates are based on the predicted values of the fitted smoothing splines. Vertical dashed lines in a–d indicate the pre-defined breakpoint (that is, 1975–1976).

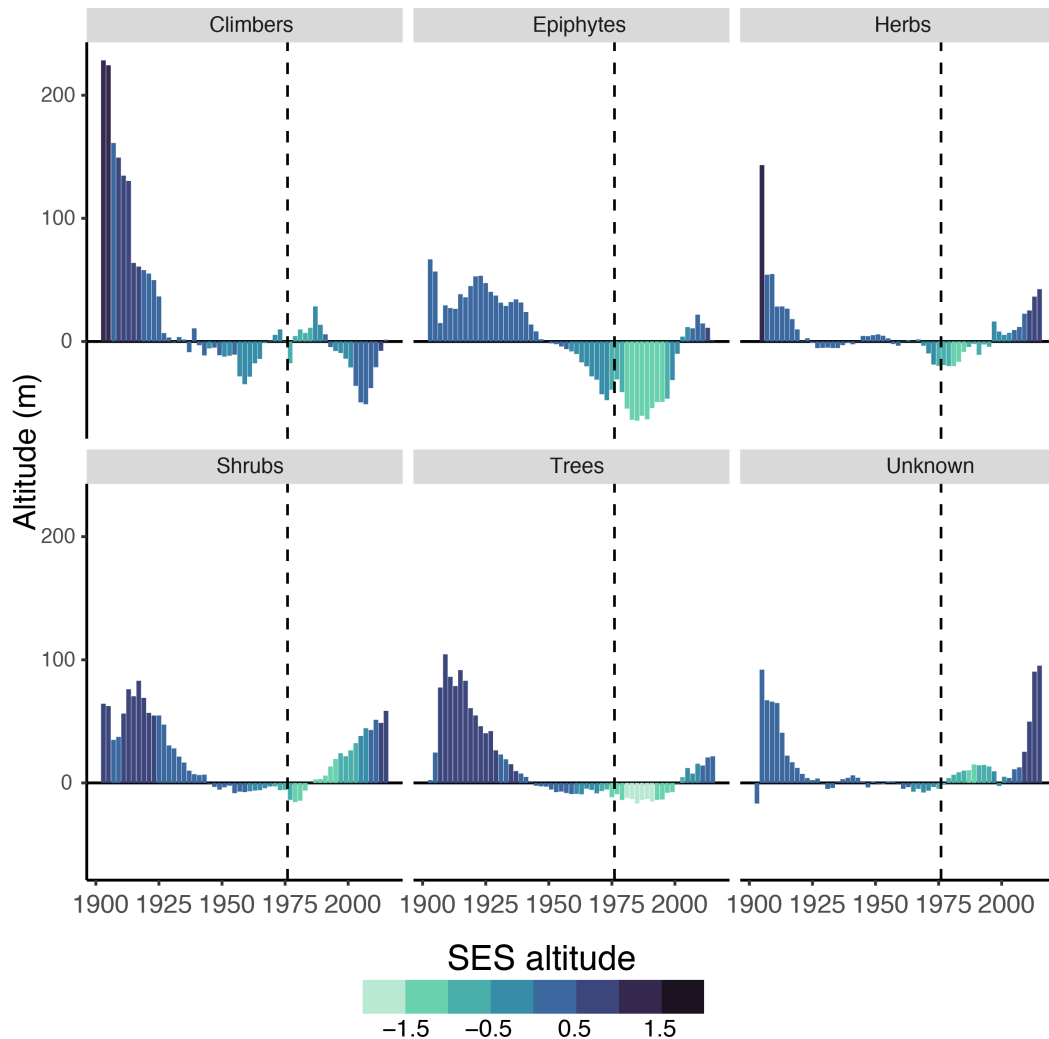

**Supplementary figure S3. Historical mean altitudinal trends for the lower range limits across Mesoamerican cloud forest plant species over the period 1901–2016.** a–c, bi-yearly mean deviations from baseline averages (that is, species' average during 1901–1975) for the upper limit of species' ranges. Species estimates are grouped by growth form. Estimates are based on the first derivative of the fitted smoothing splines averaged across individual species. Colour scale represents the mean Standardized Effect sizes (SES) across species estimated through simulations. Estimates are based on the predicted values of the fitted smoothing splines. Vertical dashed lines in a–d indicate the pre-defined breakpoint (that is, 1975–1976).

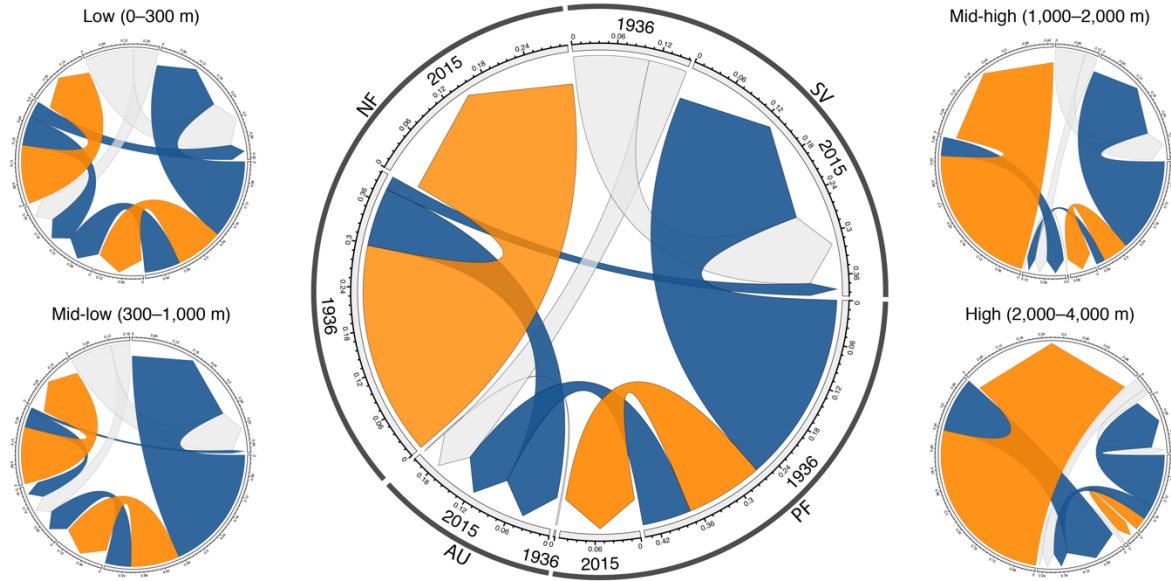

**Supplementary figure S4. Transitions in land-use categories across Mesoamerican cloud forests localities over the period 1936–2015.** Chord diagram showing the proportional ‘flow’ among the four land-use categories between two years (1936 and 2015): Agriculture-urban (AU), Primary forests (PF), Non-forest vegetation (NF), and Secondary vegetation (VG). The central larger circle represents land-use transitions across all grid-cells and smaller circles represent land-use transitions estimated across four altitudinal belts: Low (0–300 m), Middle-low (300–1,000 m), Middle-high (1,000–2,000), and High (>2,000 m). In all cases, flows for the PF and NF categories are highlighted to represent permanence within the same primary vegetation category (orange or light grey) or transition into other categories (blue or dark grey). The width of the flows represents the proportion of grid-cells transitioning among categories/years. The size of the fragments in the outer circles is proportional to the number of grid-cells within each category per year, where the sum of the four categories for each year equals one.



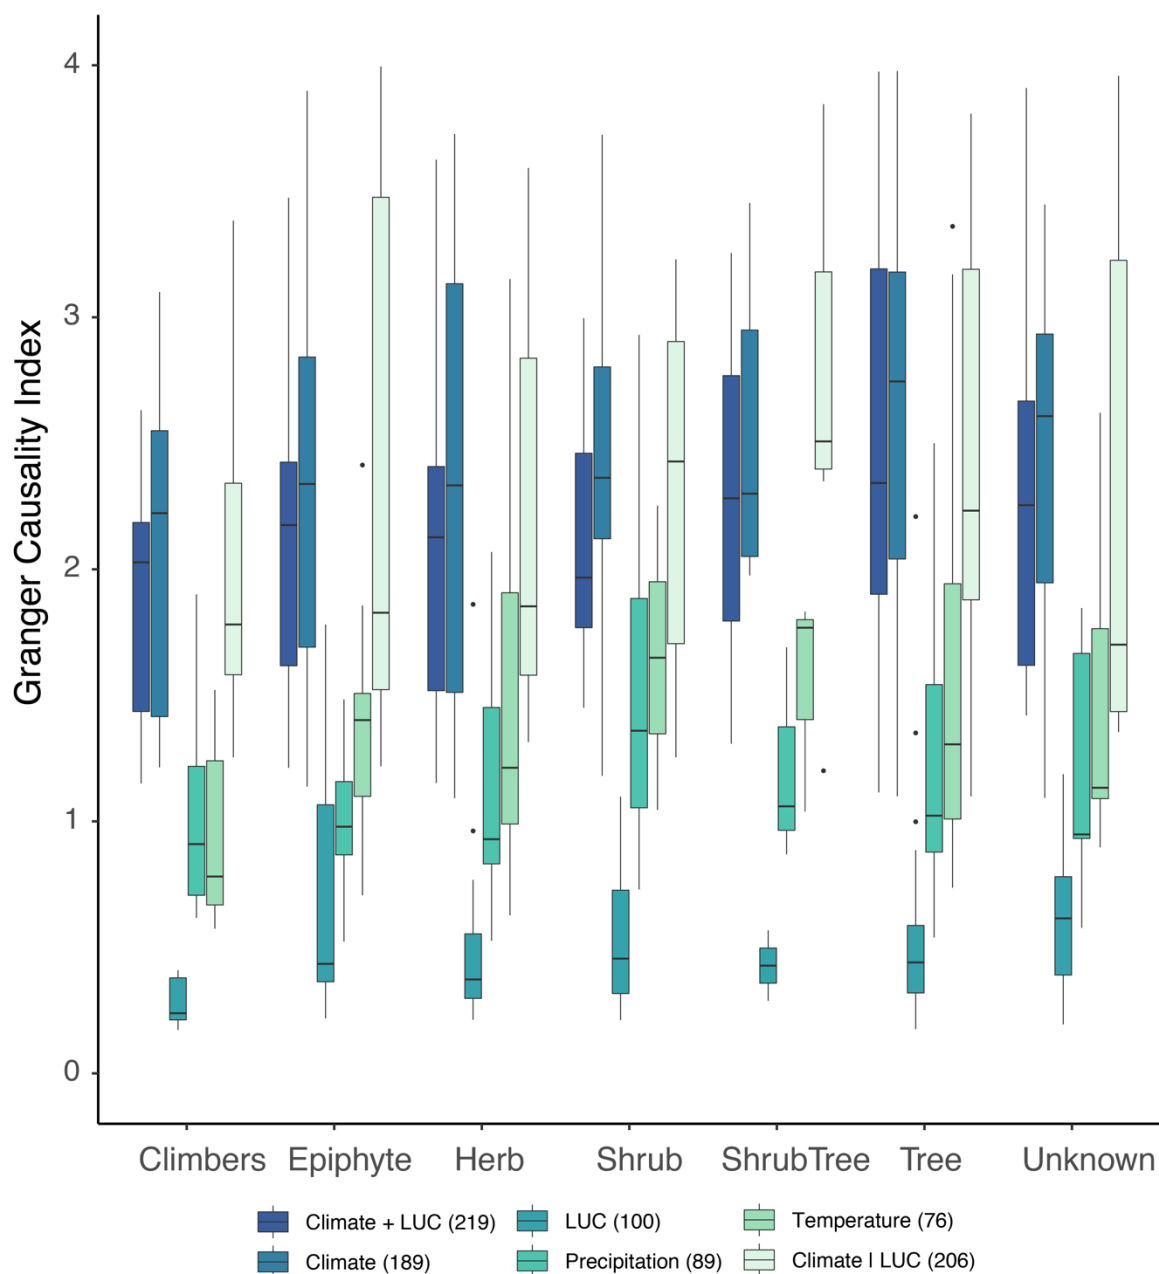

**Supplementary figure S5. Granger causal influence of climate and land-use change time series on species historical trends of species upper range limits over the period 1901–2016.** Boxplots showing the distribution of the per-species Granger Causality Index (GCI) of the different climate change land-use time series. Species estimates are grouped by growth form. All estimates are for species with a significant GCI (p-value < 0.05).

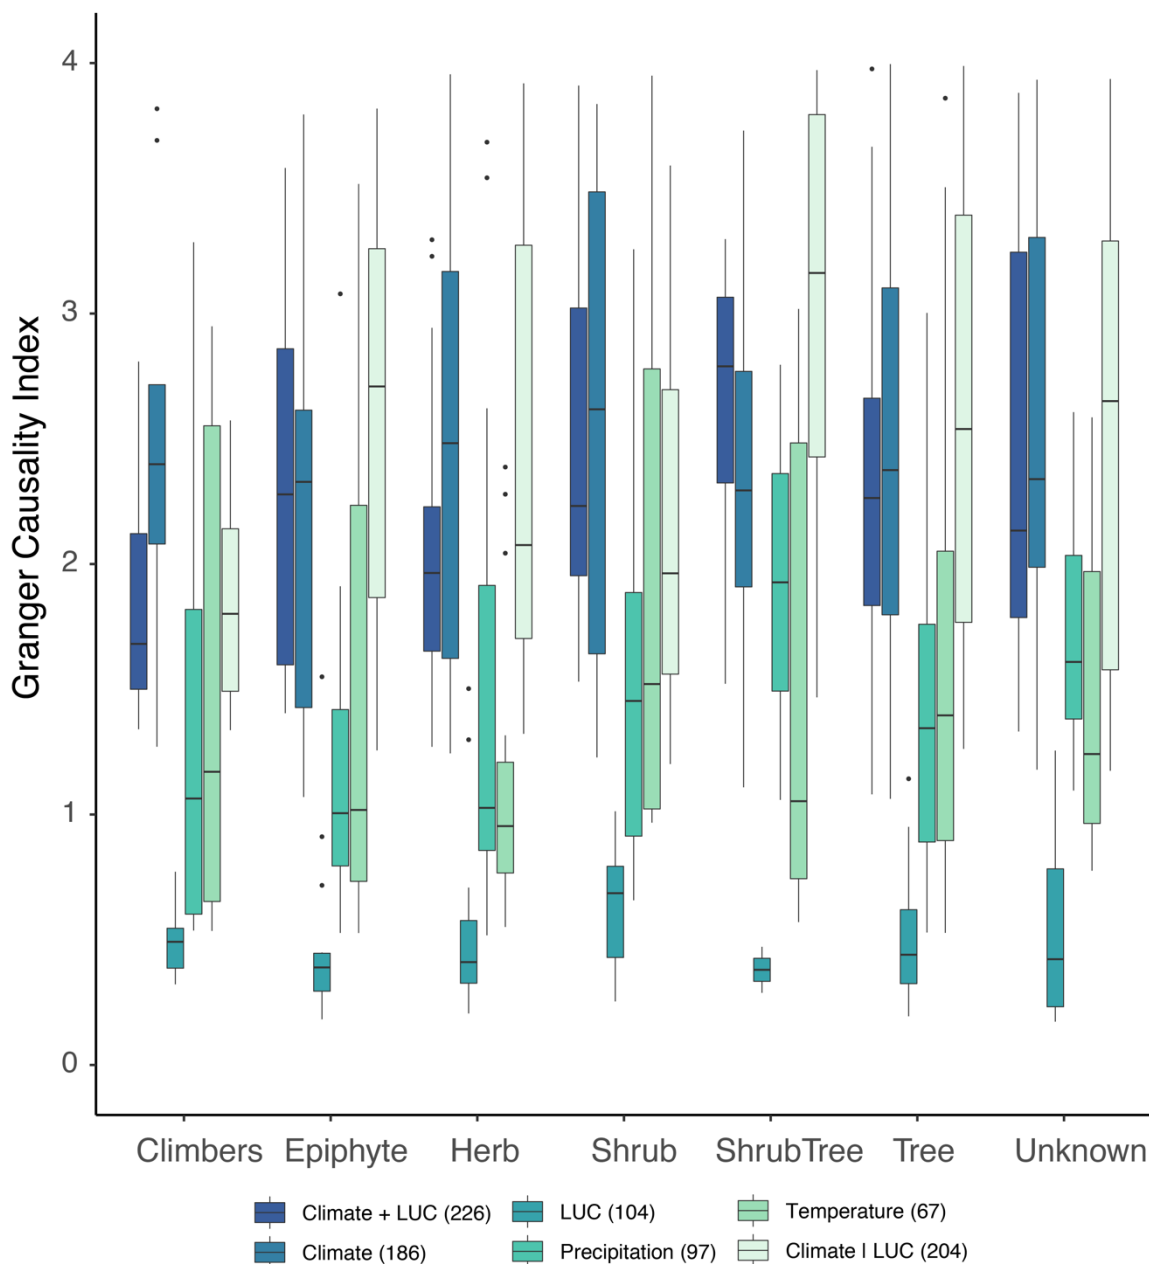

**Supplementary figure S6. Granger causal influence of climate and land-use change time series on species historical trends of species mid-range point over the period 1901–2016.** Boxplots showing the distribution of the per-species Granger Causality Index (GCI) of the different climate change land-use time series. Species estimates are grouped by growth form. All estimates are for species with a significant GCI ( $p$ -value < 0.05).

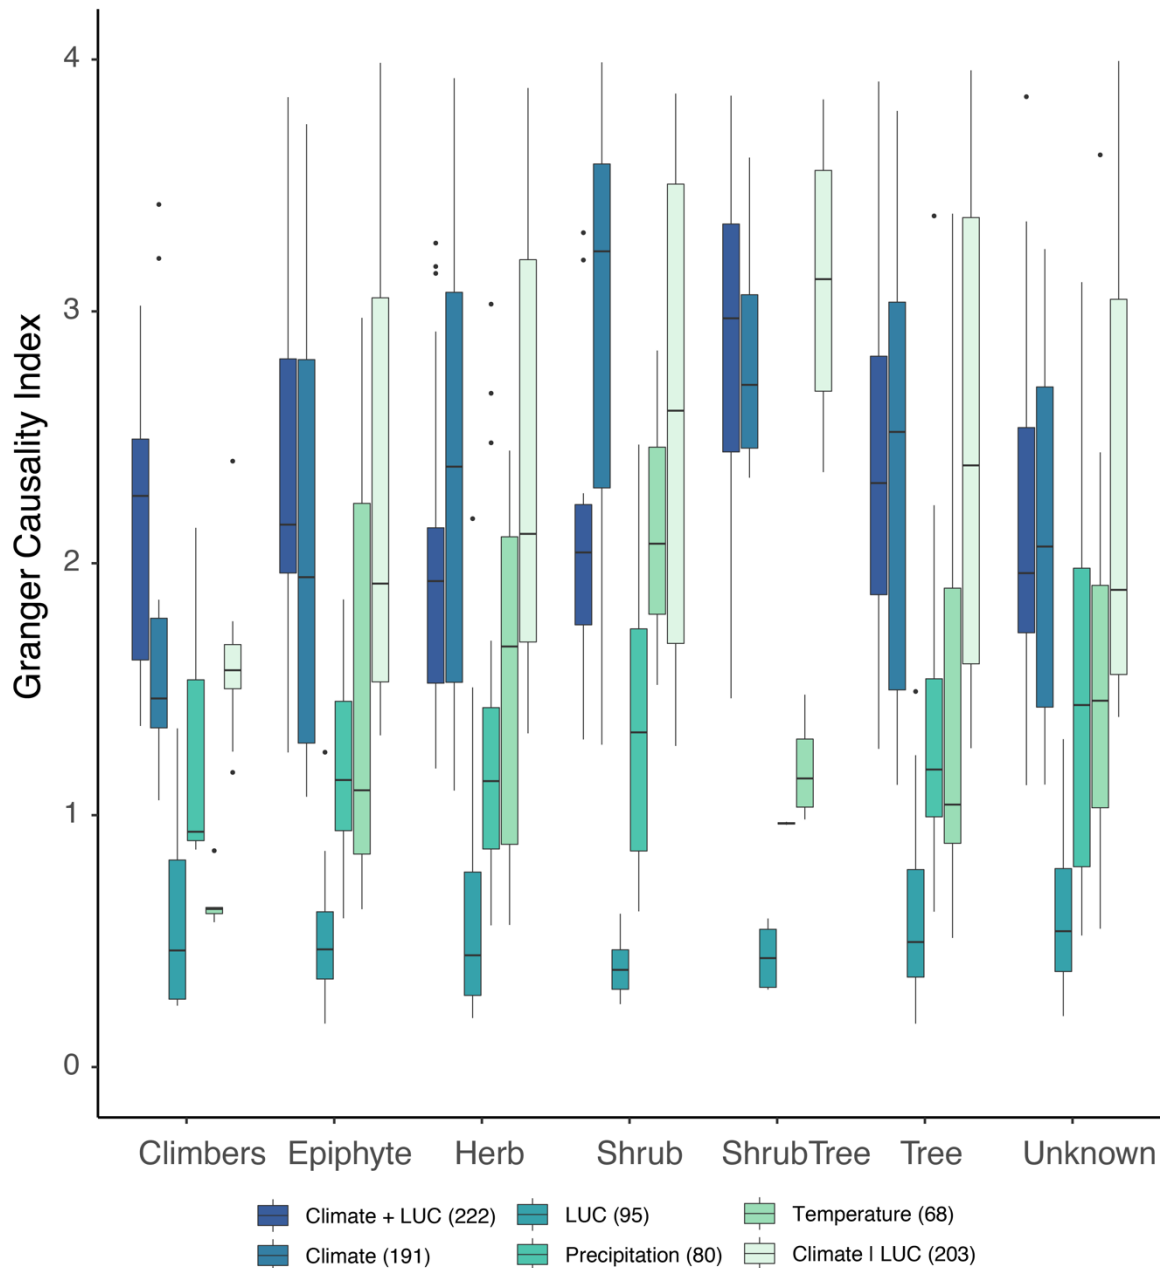

**Supplementary figure S7. Granger causal influence of climate and land-use change time series on species historical trends of species lower range limits over the period 1901–2016.** Boxplots showing the distribution of the per-species Granger Causality Index (GCI) of the different climate change land-use time series. Species estimates are grouped by growth form. All estimates are for species with a significant GCI ( $p$ -value < 0.05).
